# Supplementary figures and images for: Metacontrol of decision-making strategies in human aging
Source: eLife journal article supplement (doi:10.7554/elife.49154), 2019-08-09

## Younger adults

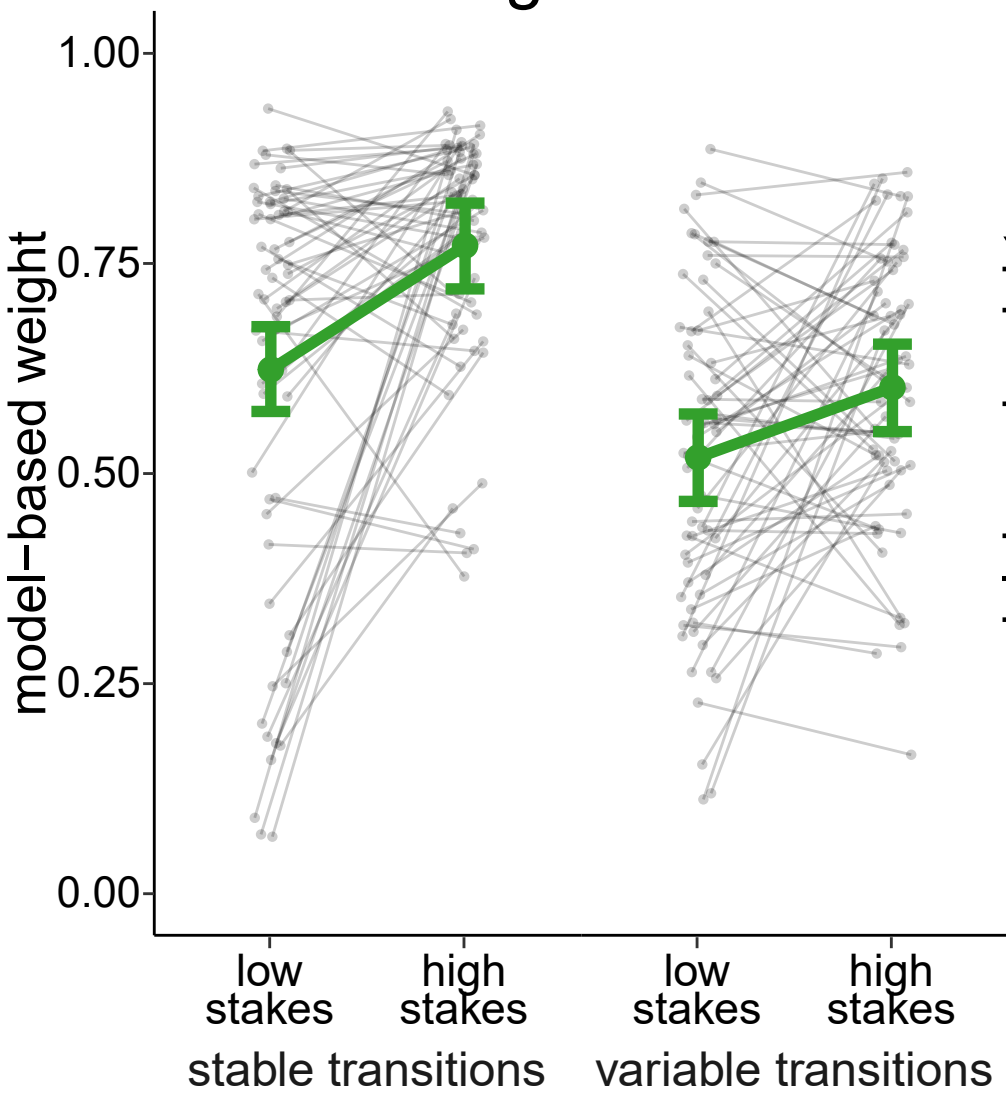

## Older adults

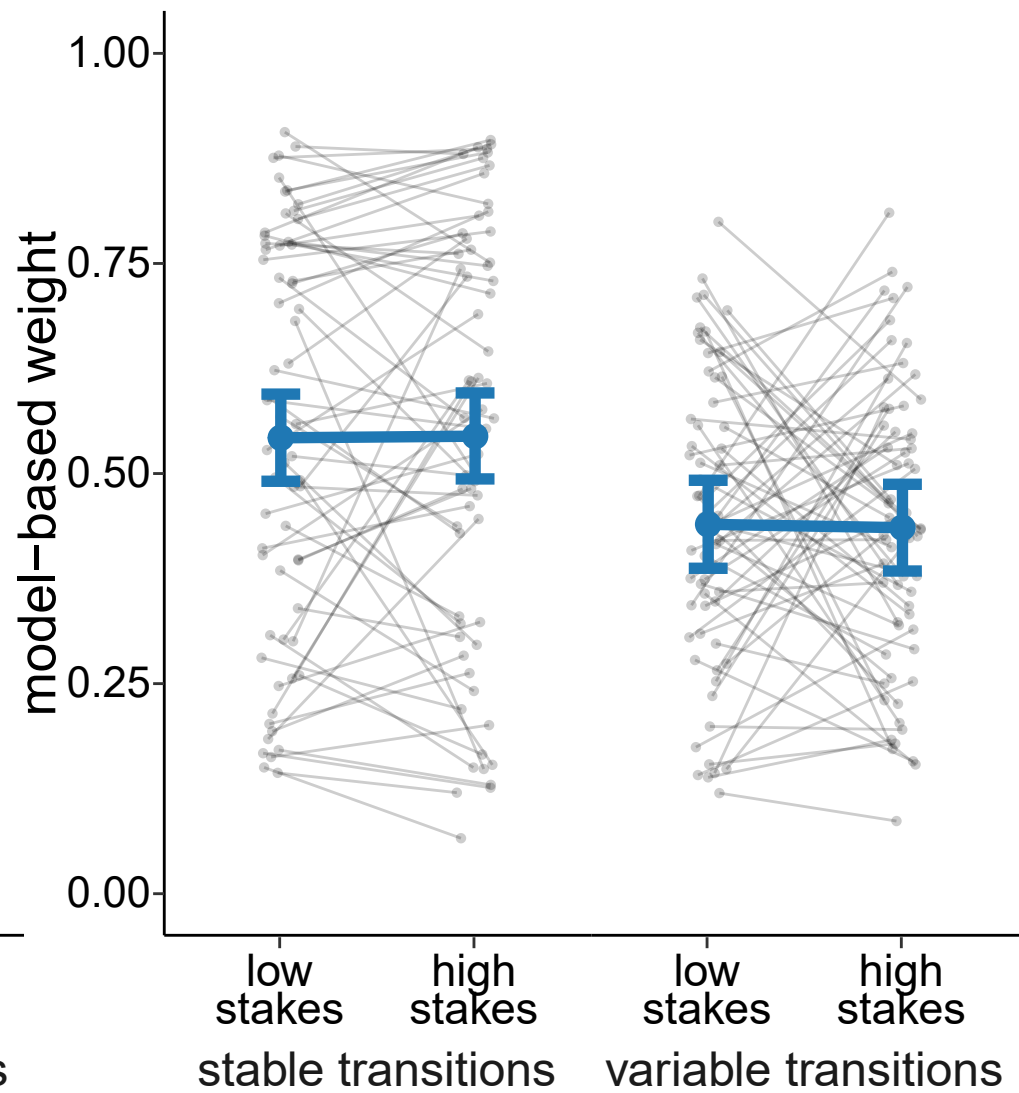

Supplement: supp [file elife_poa_e49154_Figure_2_figure_supplement_1.pdf › elife_poa_e49154_Figure_2_figure_supplement_1.pdf]
